# Supplementary material for: The Marginal Cost of Frailty Among Medicare Patients on Hemodialysis
Source: PubMed Central journal article supplement — Kidney Int Rep. 2019 Dec 6;5(3):289–95. doi: 10.1016/j.ekir.2019.11.020 (PMC7056859; doi:10.1016/j.ekir.2019.11.020), 2019-12-06
Supplement: mmc1.pdf [file mmc1.pdf]

**Supplemental Table S1.** Adjusted mean point estimates and percentage differences in expenditures between frail and non-frail patients for patient patients who have claims from all three Medicare parts (Parts A, B, and D). Point estimates standardized to average age and BMI of all study participants. N = 345

|                    | <b>Non-Frail<br/>x1,000 \$/pppy<br/>(95% CI)</b> | <b>Frail<br/>x1,000 \$/pppy<br/>(95% CI)</b> | <b>Percentage Difference<br/>in Expenditures (95%<br/>CI)</b> |
|--------------------|--------------------------------------------------|----------------------------------------------|---------------------------------------------------------------|
| <b>Total Costs</b> | 81.7 (73.7 – 90.5)                               | 100.3 (87.8 – 114.6)                         | +22.8% (+10.0 to +37.0)                                       |
| <i>Dialysis</i>    | 26.0 (24.1 – 27.9)                               | 23.9 (21.7 – 26.2)                           | -8.1% (-15.7 to +0.3)                                         |
| <i>Outpatient</i>  | 12.0 (10.3 – 13.9)                               | 15.7 (13.4 – 18.4)                           | +31.1% (+12.5 to +52.7)                                       |
| <i>Inpatient</i>   | 22.1 (17.2 – 28.3)                               | 36.3 (27.0 – 48.9)                           | +64.4% (+27.6 to<br>+112.0)                                   |
| <i>Physician</i>   | 10.1 (8.6 – 11.9)                                | 11.4 (9.5 – 13.7)                            | +12.7% (-1.8 to +29.3)                                        |
| <i>Medication</i>  | 10.3 (8.6 – 12.5)                                | 10.5 (8.6 – 12.9)                            | +1.7% (-8.4 to +12.9)                                         |

\*Adjusted for age, sex, BMI, race, and comorbidities (diabetes, coronary artery disease, and congestive heart failure)
